# Supplementary material for: Superiority of Low‐Dose Benzbromarone to Low‐Dose Febuxostat in a Prospective, Randomized Comparative Effectiveness Trial in Gout Patients With Renal Uric Acid Underexcretion
Source: PubMed Central journal article supplement — Arthritis Rheumatol. 2022 Nov 11;74(12):2015–23. doi: 10.1002/art.42266 (PMC9771863; doi:10.1002/art.42266), 2022-11-11
Supplement: NIHMS1817290-supplement-1.pdf [file NIHMS1817290-supplement-1.pdf]

Supplement Table1 Drugs affecting serum urate.

---

Drugs arising serum urate

Indapamide, Propranolol, Nifedipine, Telmisartan, Hydrochlorothiazide, Nimodipine, Edecrin, Furosemide, Insulin, Metformin, Glyburide, Gliclazide, Norfloxacin, Ciprofloxacin, Levofloxacin, Penicillin, Cephalosporin, Cyclophosphamide, Pyrazinamide, Sulfamethoxazole, Trimethoprim, Theophylline, Aspirin (over 325mg/d), or other salicylic acid drugs, Glucocorticoids, Ciclosporin, Vitamin B1, Vitamin B12, Fructose, Antituberculosic, Pancreatin, Levodopa, Inosine Tablets and Omeprazole.

Drugs decreasing serum urate

Fenofibrate, Losartan, Atorvastatin calcium, Lovastatin

---
